# Supplementary material for: Simultaneous determination of Sm–Nd isotopes, trace-element compositions and U–Pb ages of titanite using a laser-ablation split-stream technique with the addition of water vapor
Source: Royal Society of Chemistry journal article supplement (doi:10.1039/d1ja00246e), 2021-01-01
Supplement: d1ja00246e1.pdf [file d1ja00246e1.pdf]

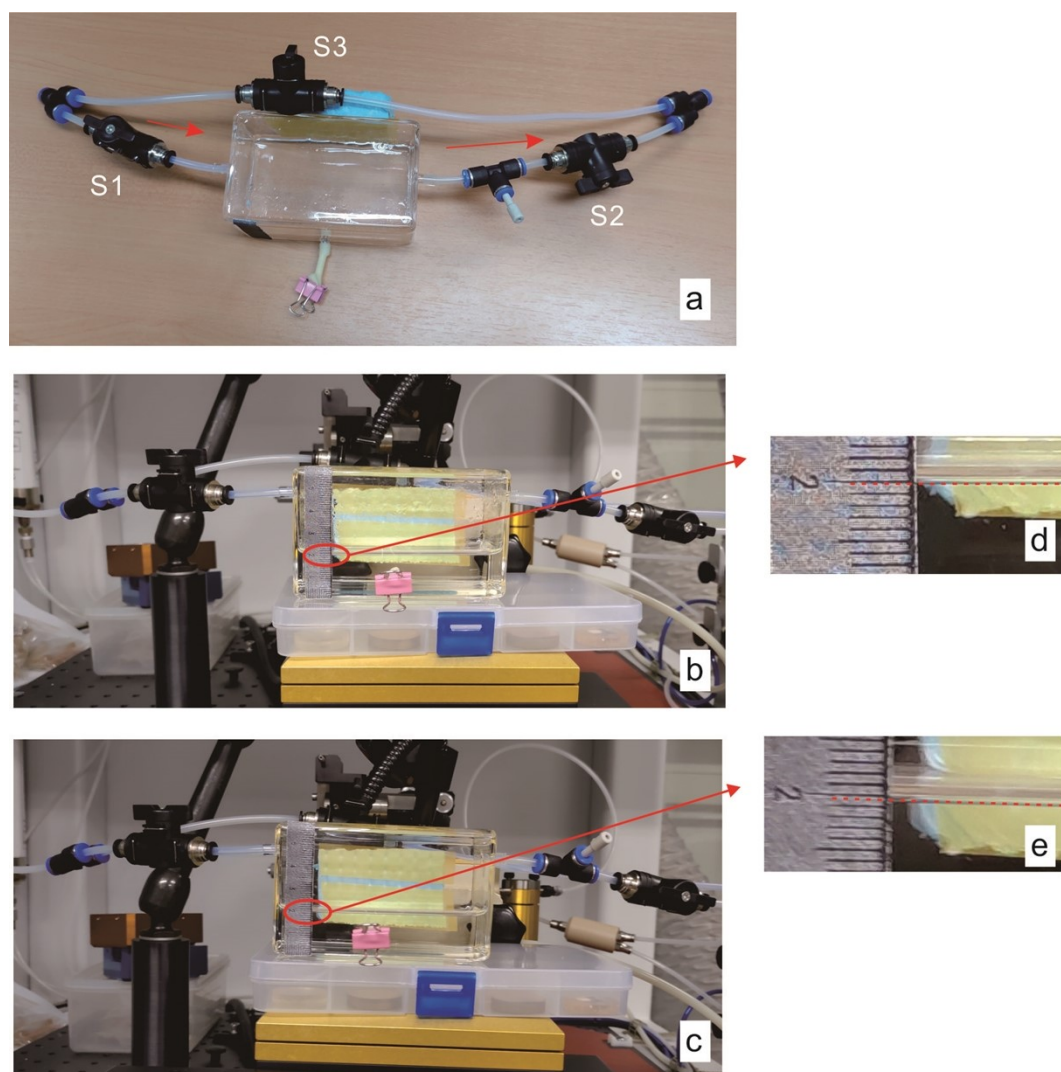

**Figure S1** (a) The water vapor introducing device used in the experiment. The size is 10 cm × 6 cm × 6 cm. S1-S3 are three switches. The rubber tube with a clip is used to add water into the device. The red arrows indicate the Helium flow direction. Close S1-S2 and open S3 will bypass the water vapor introducing device. (b-c) showing the amount of consumed water under Helium flowing through with a speed of 400 ml/min after a period of about 5 hours. (d-e) are the enlarged water surface to show the change of water height. Room temperature is 20 °C and the estimated water vapor flow speed is around 5 ml/min.

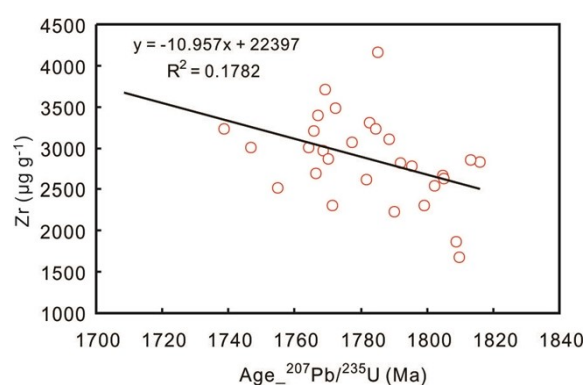

**Figure S2** The plot of Zr contents vs age\_  $^{207}\text{Pb}/^{235}\text{U}$  for titanite from the Manjinggou marble.
